# Supplementary material
Source: PubMed Central journal article supplement (PMC8983633)

# Simulation der Prognosekorridore der Intensivbettenbelegung für die Bundesländer

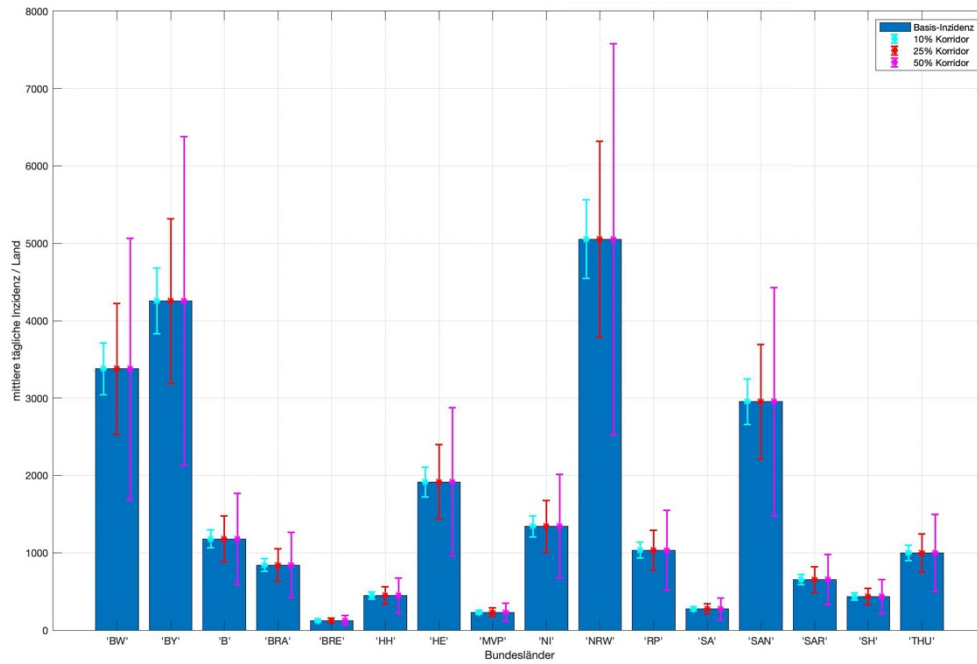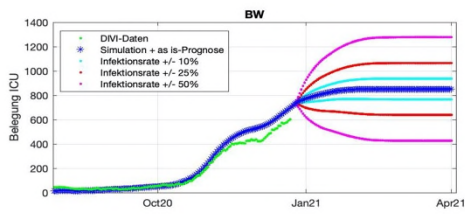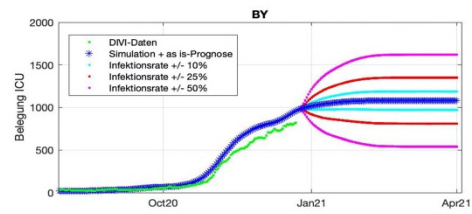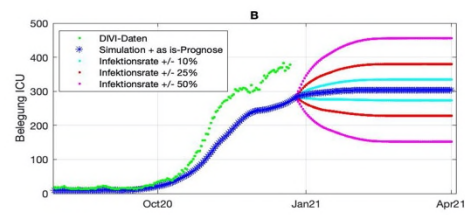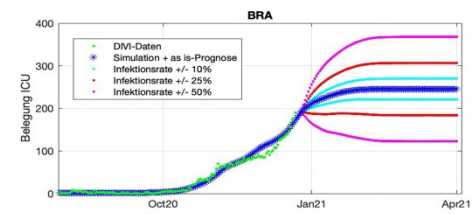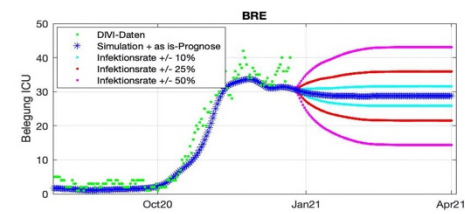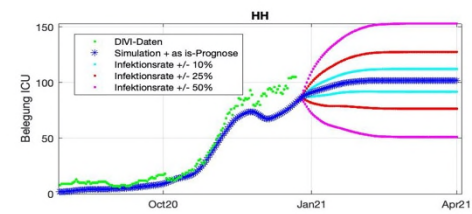

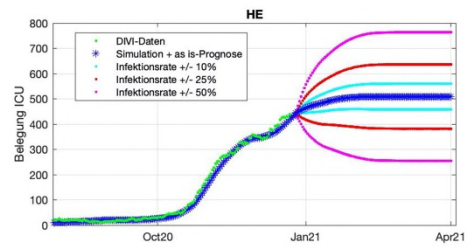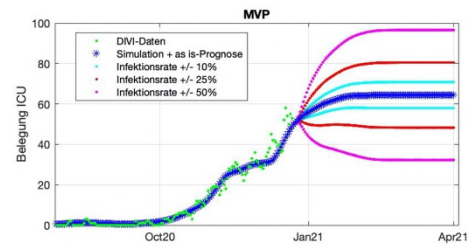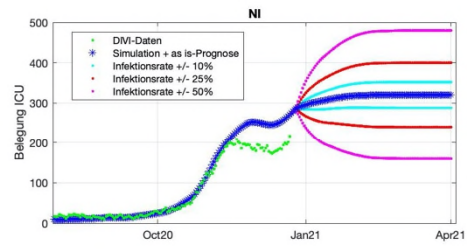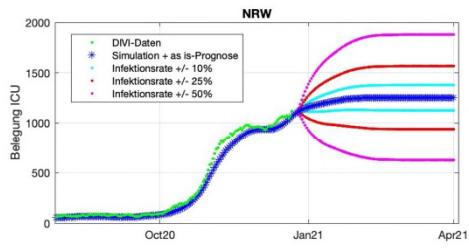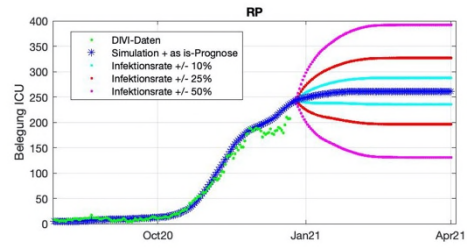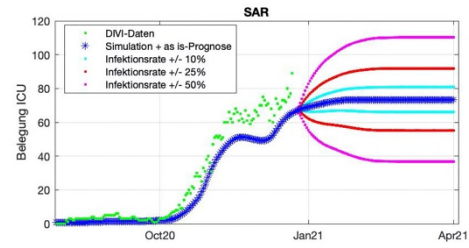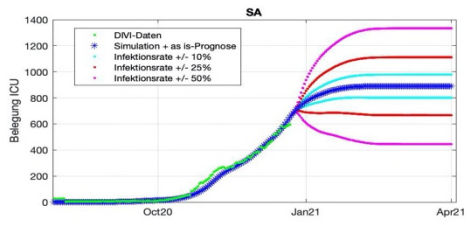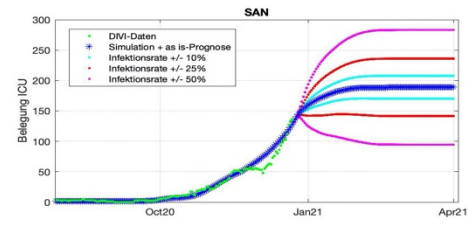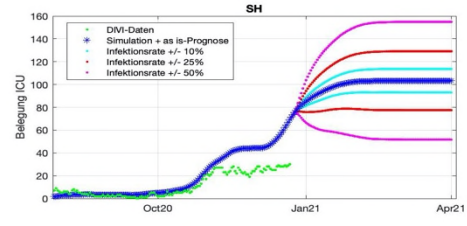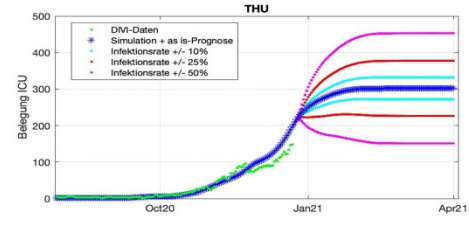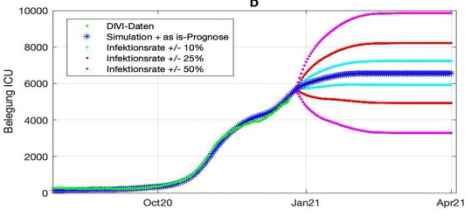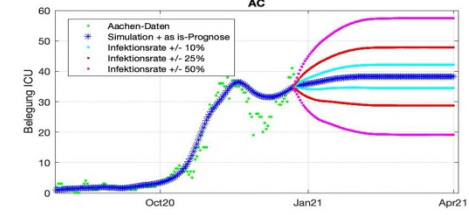

Supplement: 63_2021_791_MOESM1_ESM.pdf [file 63_2021_791_MOESM1_ESM.pdf]
